# Supplementary material
Source: Research Square preprint supplement (doi:10.21203/rs.3.rs-9657194/v1)
Supplement: Supplementary file 1 [file 0f9f5e582f87f9ab946ed042.pdf]

# Supplementary Figure 1.

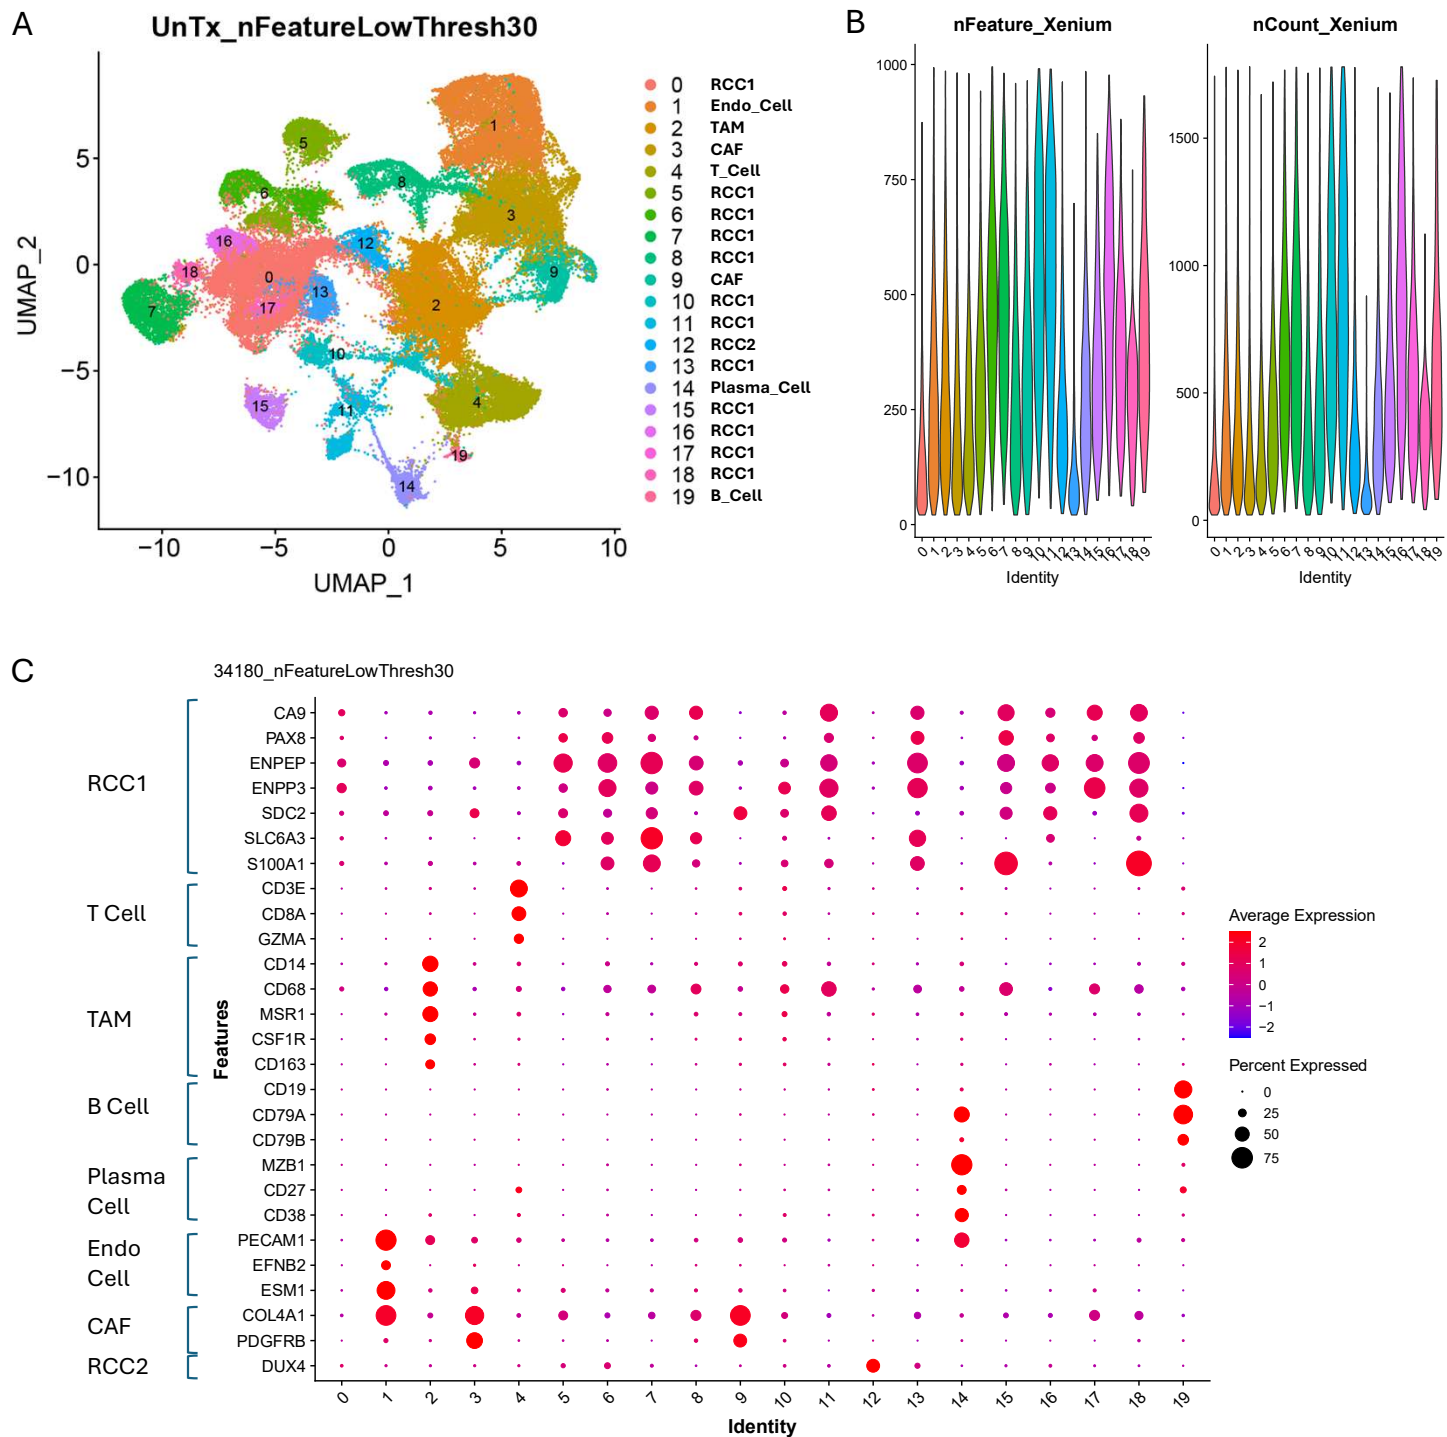

**Fig. S1. Unsupervised clustering of cells from treatment naïve RCC tumors and marker-based annotation.**

A. UMAP visualization and annotation of cell clusters within the tumor microenvironment of treatment-naïve tumors. B. Number of spatial features and total feature counts for each cluster. C. Dot plot displaying canonical marker genes used to annotate each cluster.

# Supplementary Figure 2.

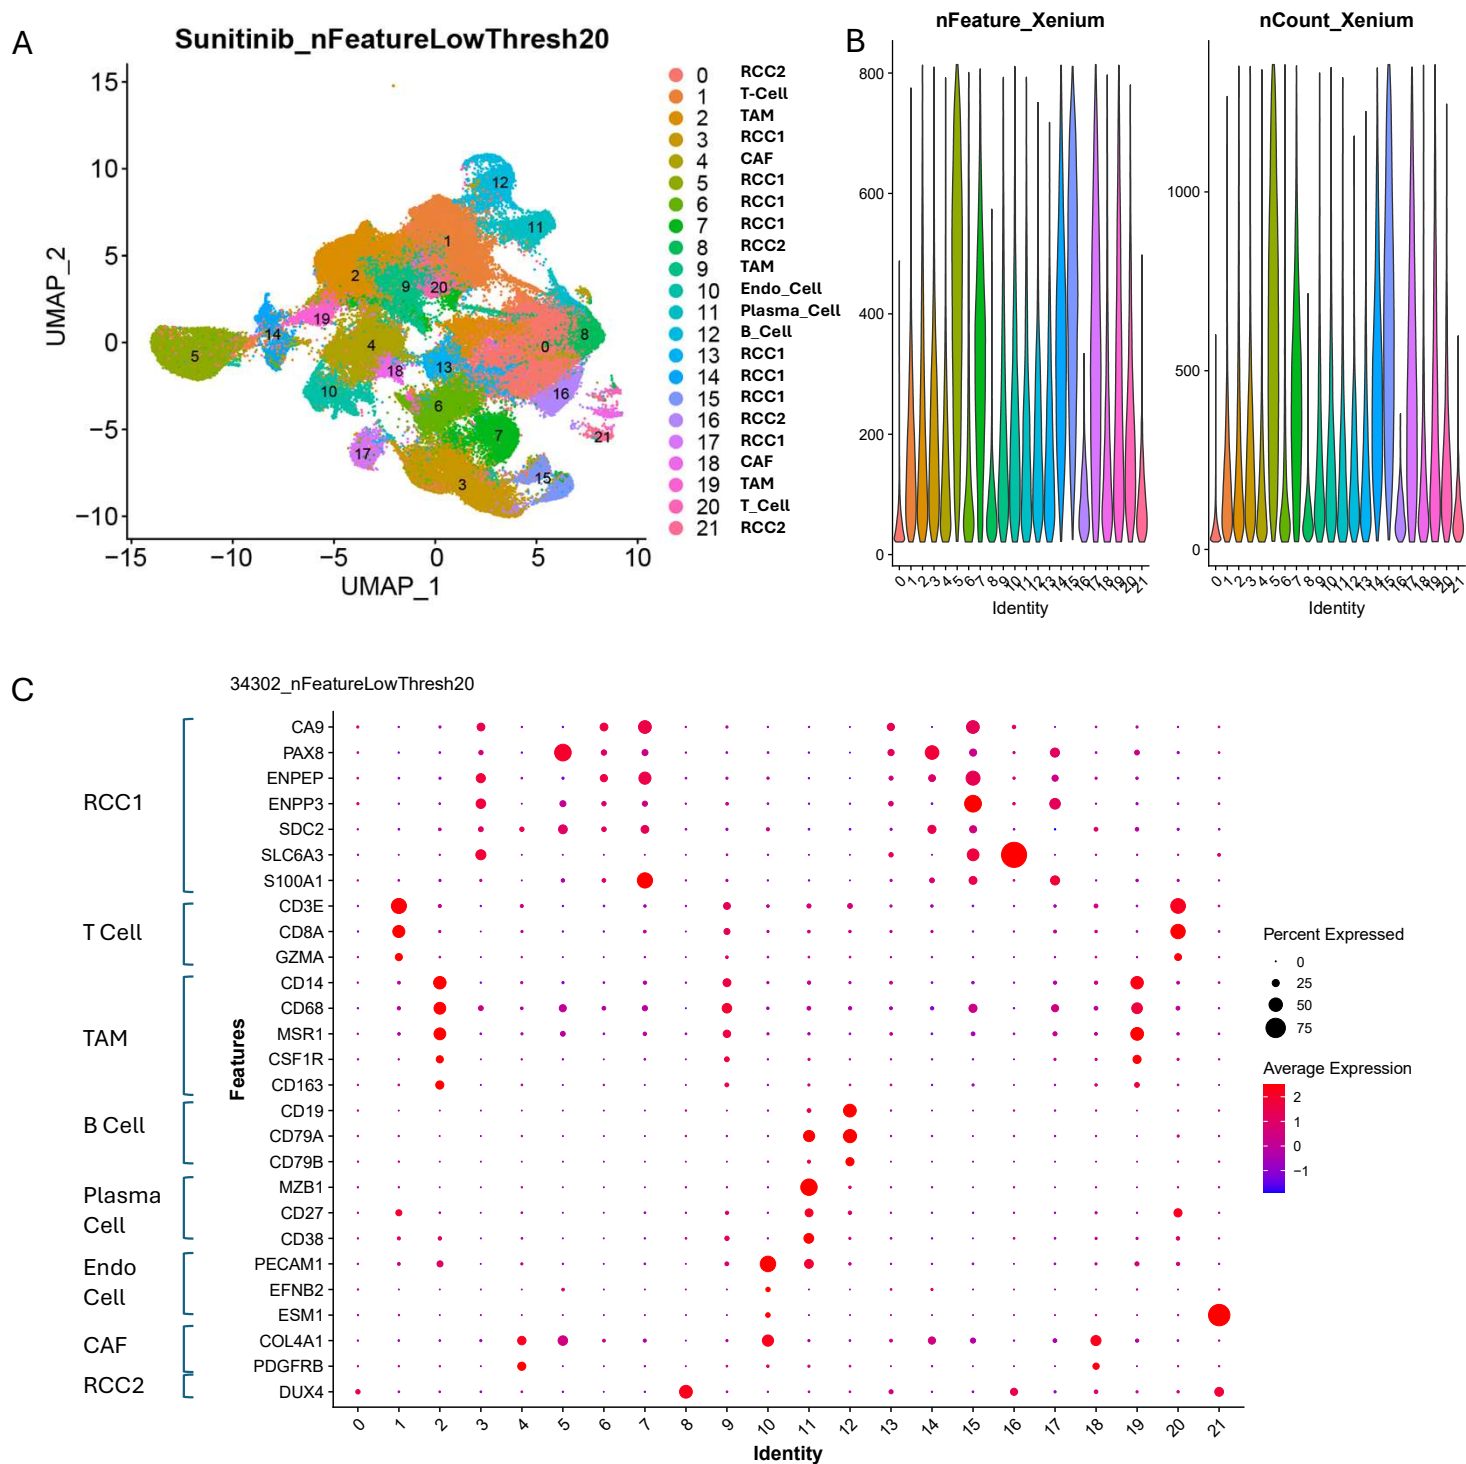

**Fig. S2. Unsupervised clustering of cells from sunitinib-treated RCC tumors and marker-based annotation.**

A. UMAP visualization and annotation of cell clusters within the tumor microenvironment of sunitinib-treated tumors. B. Number of spatial features and total feature counts for each cluster. C. Dot plot displaying canonical marker genes used to annotate each cluster.

# Supplementary Figure 3.

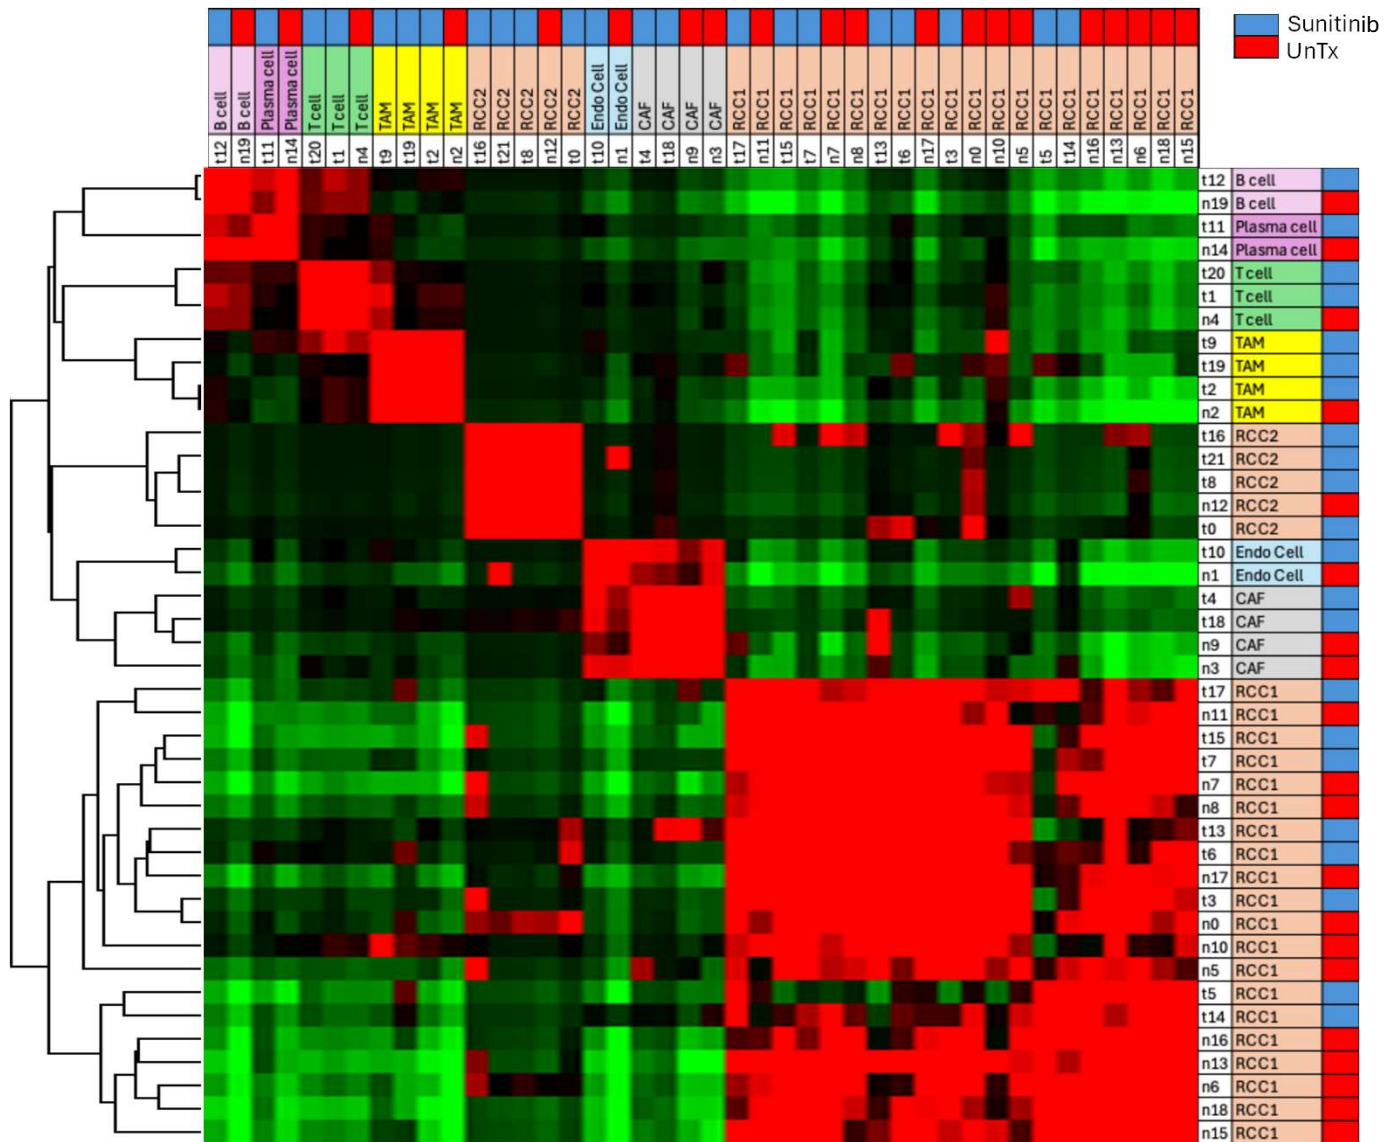

**Fig. S3. Correlation analysis of clusters and cell types from treatment naïve and sunitinib treated tumors.**

Hierarchical clustering of all clusters from both slides based on pairwise similarity of transcriptional profiles, defined by the relative activity of differentially upregulated genes on each slide.

Supplementary Figure 4.

A

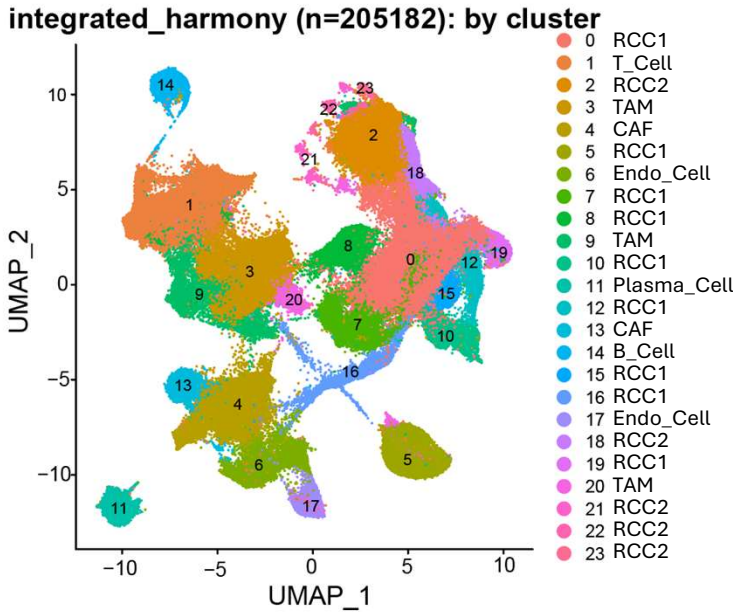

B

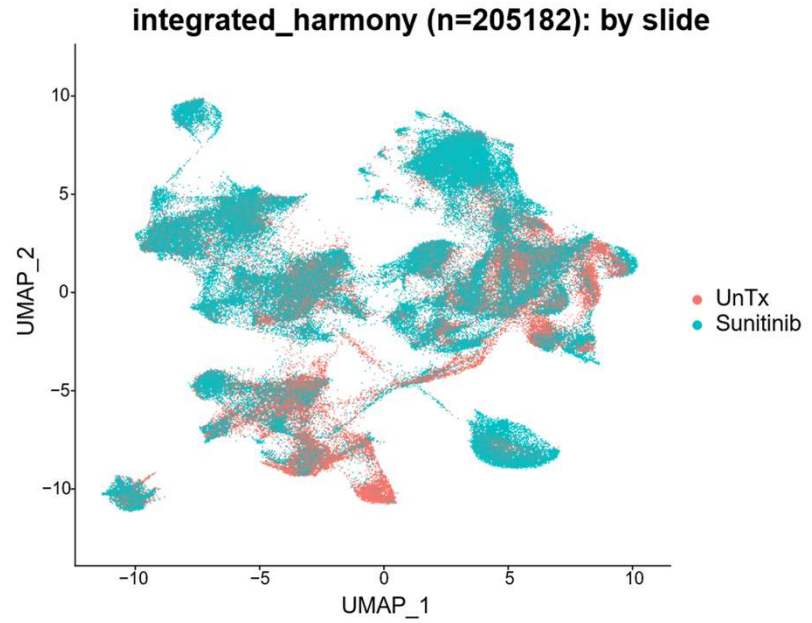

C

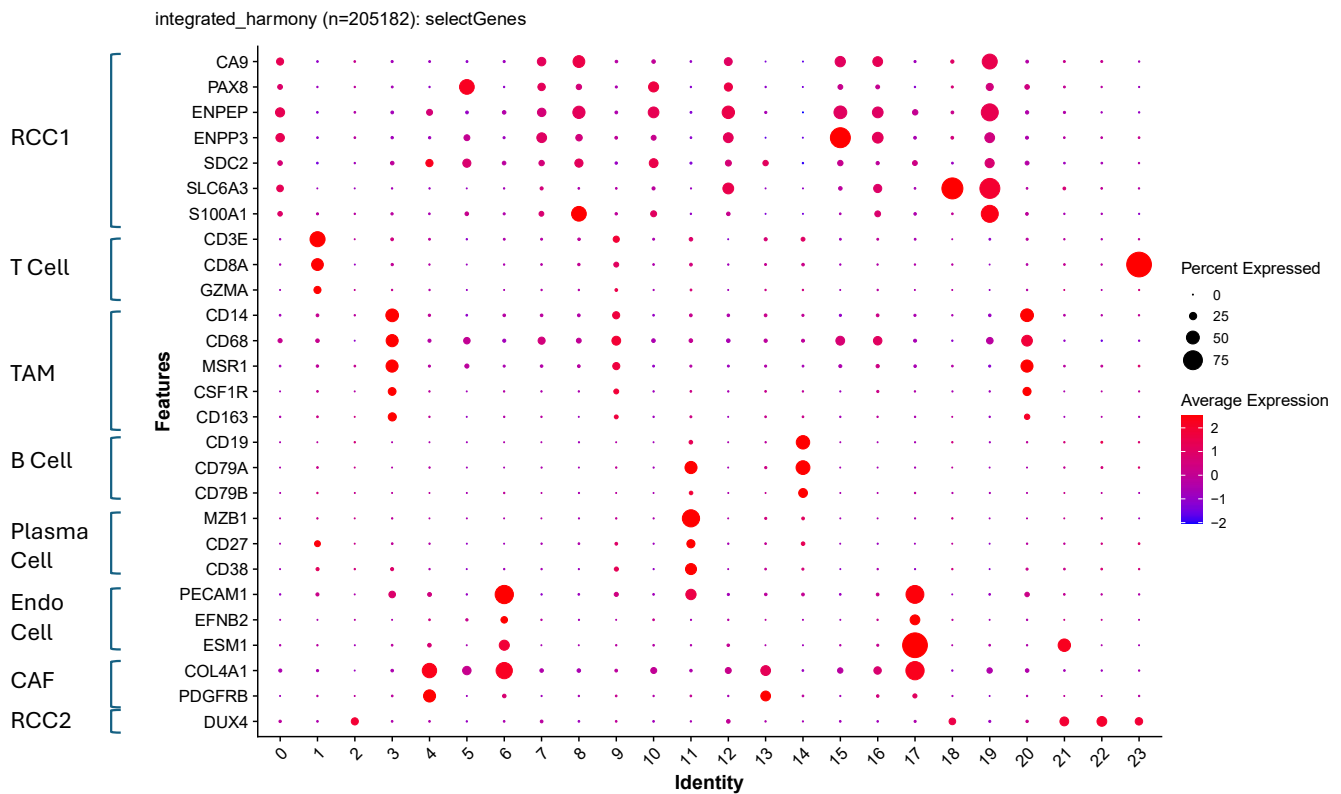

**Fig. S4. Unsupervised clustering and annotation of cells integrated from treatment-naïve and sunitinib-treated RCC tumors.**

A. UMAP visualization showing clustering and annotation of cell populations within the tumor microenvironment. B. Number of spatial features and total feature counts across each cluster. C. Dot plot illustrating canonical marker genes used for cluster annotation.

## Supplementary Figure 5.

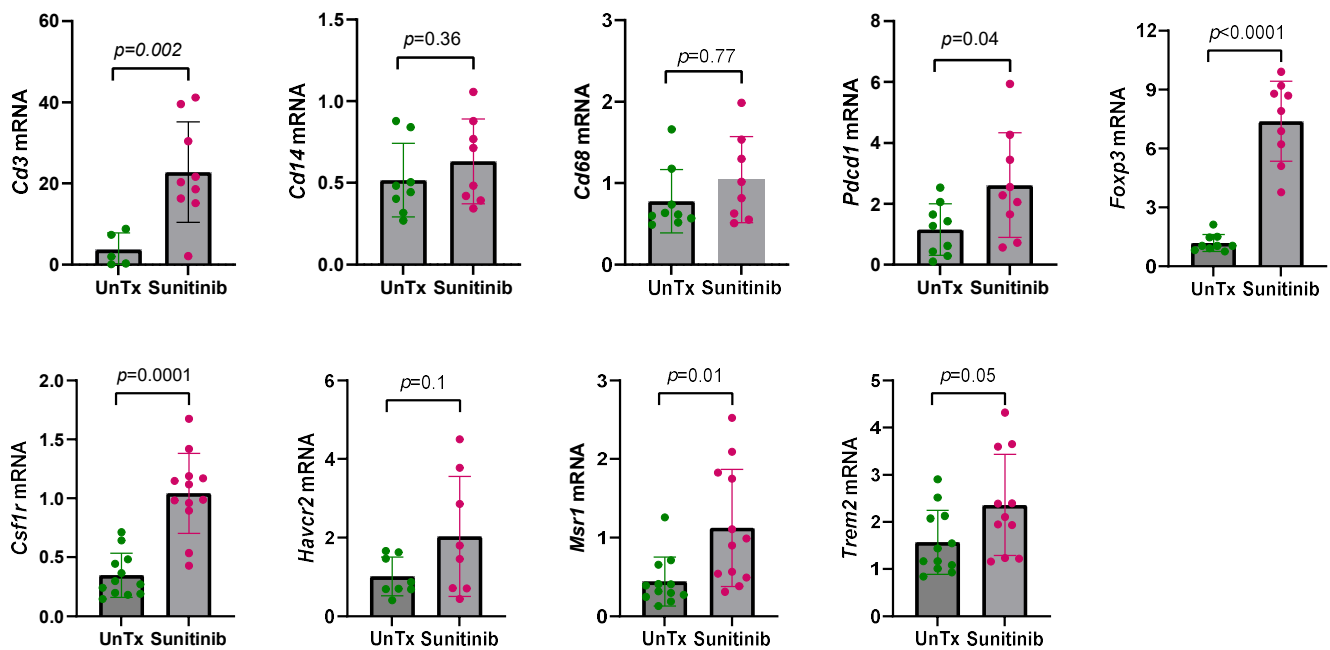

**Fig. S5. Sunitinib treatment increases the expression of immunosuppressive genes in Renca-Balb/c tumors.**

Real-time PCR analysis of immune-related gene expression in treatment-naïve and sunitinib-treated Renca tumors.

# Supplementary Figure 6.

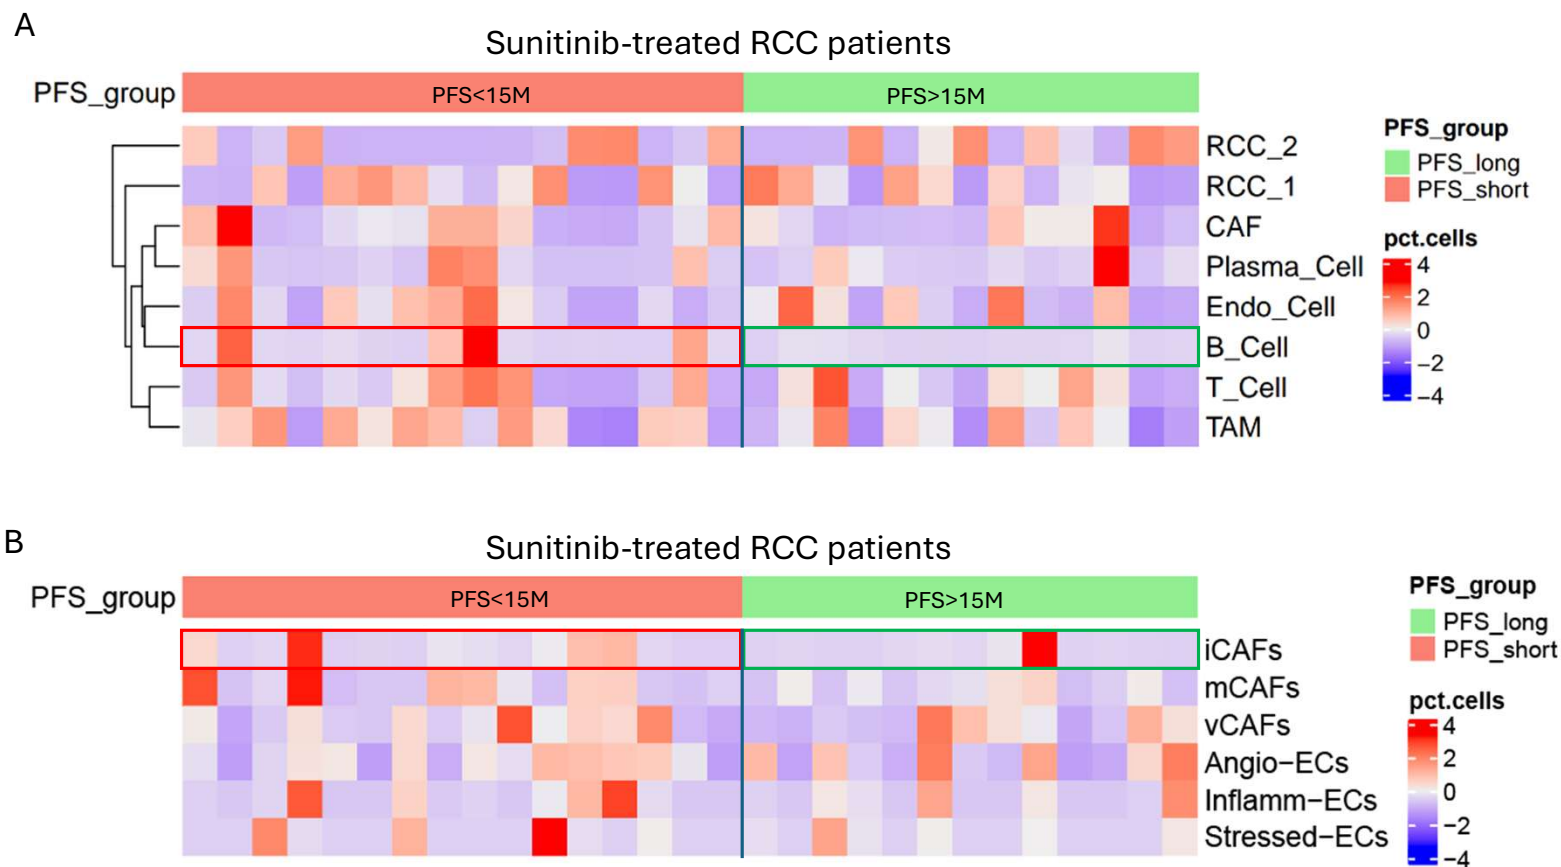

**Fig. S6. Association between PFS and major cell types, CAF subtypes, and endothelial cell subtypes in sunitinib-treated cohorts.**

A. Relationship between PFS and the abundance of major cell types. B. Relationship between PFS and CAF and endothelial cell subtypes. RCC patients were grouped into PFS-long (>15 months) and PFS-short cohorts. For each patient, the percentage of each cell type or subtype across different tumor regions was averaged, and cell abundance was aligned with patient PFS.

# Supplementary Figure 7.

Mixture: cutoff = -0.3, all immune subtype

A

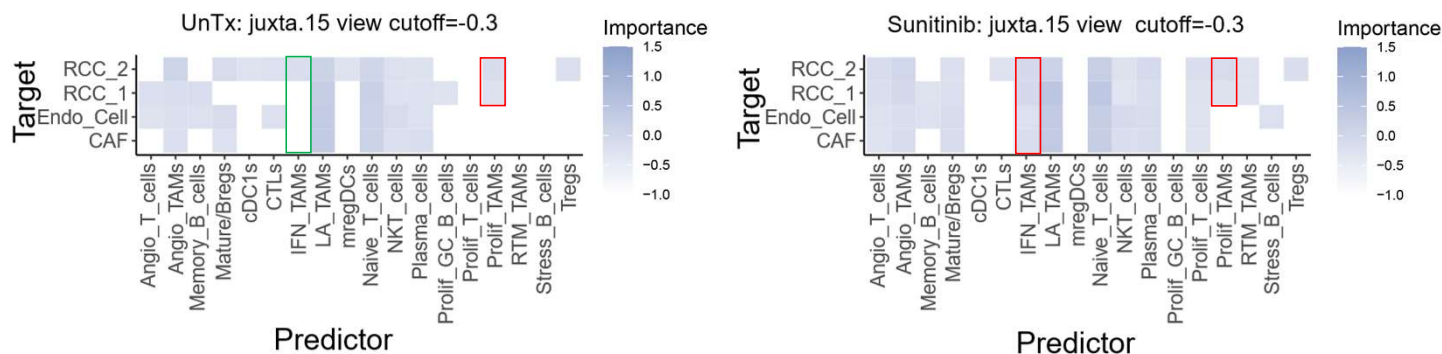

B

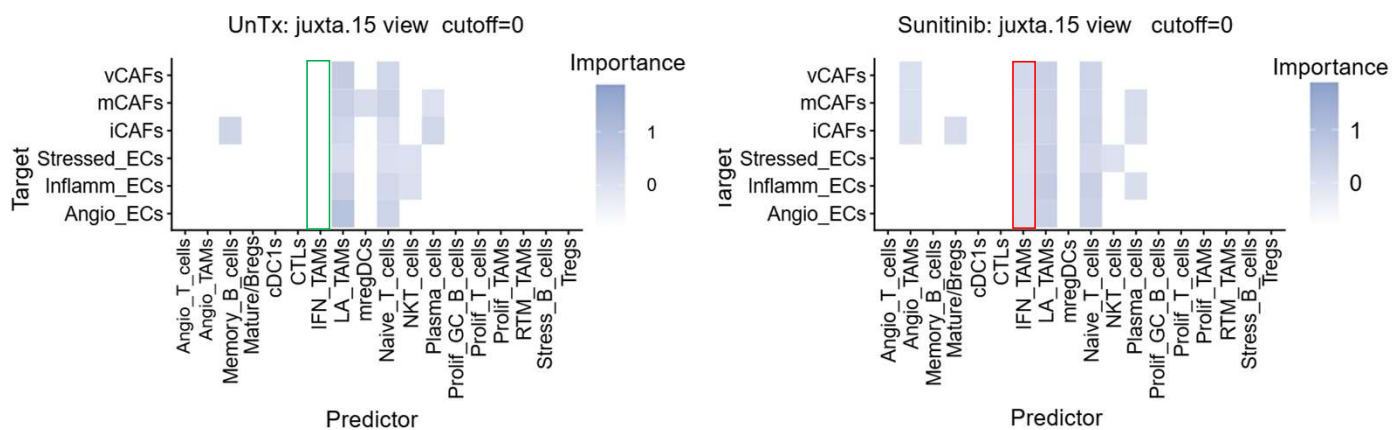

**Fig. S7. MISTy analysis of intercellular interactions between immune subsets and RCC cells, endothelial cells, CAFs or their subtypes.**

A. Interactions between immune subsets and RCC cells, endothelial cells, and CAFs. B. Interactions between immune subsets and endothelial cell and CAF subtypes.

| <b>Cell type</b> | <b>Marker genes</b>                                        |
|------------------|------------------------------------------------------------|
| RCC1             | <i>RCC1; CA9, PAX8, ENPEP, ENPP3, SDC2, SLC6A3, S100A1</i> |
| RCC2             | <i>DUX4</i>                                                |
| CAF              | <i>COL4A1, PDGFRB</i>                                      |
| T Cell           | <i>CD3, CD8A, GZMA</i>                                     |
| TAM              | <i>CD68, MSR1, CSF1R, CD163</i>                            |
| B cell           | <i>CD19, CD79A, CD79B</i>                                  |
| Plasma           | <i>MZB1, CD27, CD38</i>                                    |

**Table S1. Marker genes of cell types.**

|           | B Cell | CAF   | Endo Cell | Plasma | RCC1  | RCC2  | T Cell | TAM   |
|-----------|--------|-------|-----------|--------|-------|-------|--------|-------|
| B Cell    | 3654   | 53    | 12        | 12     | 15    | 32    | 67     | 27    |
| CAF       | 21     | 17987 | 643       | 88     | 570   | 219   | 258    | 255   |
| Endo Cell | 5      | 512   | 10881     | 17     | 333   | 53    | 62     | 225   |
| Plasma    | 30     | 29    | 9         | 4528   | 59    | 15    | 24     | 6     |
| RCC1      | 16     | 650   | 586       | 9      | 73513 | 3882  | 399    | 815   |
| RCC2      | 244    | 1101  | 297       | 271    | 1290  | 23870 | 478    | 564   |
| T Cell    | 262    | 1001  | 300       | 147    | 435   | 373   | 22127  | 855   |
| TAM       | 36     | 616   | 134       | 161    | 2325  | 456   | 722    | 26545 |

**Table S2. Agreement of cell annotations before and after integration.**

Comparison of cell type annotations assigned before and after integration. Cells with agreement were highlighted in purple. Cells with discordant annotations between rows and columns are labeled as “uncertain.” Rows represent annotations after integration, and columns represent annotations before integration.

| <b>Cell subsets</b>                          | <b>Marker genes</b>                                                             |
|----------------------------------------------|---------------------------------------------------------------------------------|
| Angiogenic EC                                | <i>EDNRB, PTP4A3, HEY1</i>                                                      |
| Inflammatory EC                              | <i>CADM3, POSTN, JAM2, VCAM1, ADGRG6</i>                                        |
| Stressed EC                                  | <i>ENPP2 and ESM1</i>                                                           |
| Vessel-associated CAF                        | <i>MCAM, NOTCH3, COL18A1</i>                                                    |
| Inflammatory CAF                             | <i>CCL19, HGF, C4B, MMP14, PDGFRA</i>                                           |
| Matrix-producing CAF                         | <i>POSTN, SPON2, COL5A1</i>                                                     |
| Naïve T cell                                 | <i>CD8B, CCR7, CXCR4</i>                                                        |
| Angiogenic T cell                            | <i>CD8B, VEGFA and ANGPTL4</i>                                                  |
| Proliferating T cell                         | <i>CD8B, MKI67, TOP2A, TYMS, CXCL13</i>                                         |
| Cytotoxic T lymphocyte                       | <i>CD8B, IFNG, GZMA, GZMB, GZMK, PRF1, XCL2</i>                                 |
| Regulatory T cell                            | <i>CD4, FOXP3, CTLA4, CCR4</i>                                                  |
| Natural killer T cell                        | <i>PFFBP2, KLRC1, KLRD1</i>                                                     |
| Angiogenic TAMs                              | <i>PLVAP, ADAM8, KDR, MCAM, ESM1, NR4A1, PLAUR</i>                              |
| Lipid-associated TAMs                        | <i>ACP5, PLA2G7, F13A1</i>                                                      |
| Interferon-primed TAMs                       | <i>CXCL9, CXCL10, CXCL11, IRF1</i>                                              |
| Proliferating TAMs                           | <i>MKI67, TOP2A, RRM2, CDK1</i>                                                 |
| Resident tissue macrophage-like TAMs         | <i>CD5L, VCAM1, CETP, FOLR2</i>                                                 |
| mregDC                                       | <i>LAMP3, CD83, FSCN1, CCR7, CCL19, CCL22</i>                                   |
| cDC1                                         | <i>CLEC9A, XCR1, CLNK, DNASE1L3, IRF8, BATF3</i>                                |
| Plasma cell                                  | <i>MZB1, CD27, CD38, XBP1, PIM2</i>                                             |
| Marure B cell                                | <i>CD19, CD79A, CD79B, MS4A1, FCRL1, IL4R, CCR6, CXCL13, TLR10, SELL, CIITA</i> |
| Proliferating or germinal center like B cell | <i>MYBL2, TYMS, STMN1, TUBB, PCNA, SMC4, NUSAP1, CENPF, MKI67, TOP2A, CDK1</i>  |
| Atypical memory B cell                       | <i>LDHA, PKM</i>                                                                |
| Stress B cell                                | <i>IRF7, HSPG2</i>                                                              |

**Table S3. Marker genes of cell subtypes.**

| Murine Genes | Forward primer                | Reverse Primer                |
|--------------|-------------------------------|-------------------------------|
| Actb         | 5'-TGTCCACCTTCCAGCAGATGT-3'   | 5'-AGCTCAGTAACAGTCCGCCTAG-3'  |
| Cd68         | 5'-TGTCTGATCTTGCTAGGACCG-3'   | 5'-GAGAGTAACGGCCTTTTTGTGA-3'  |
| Cd86         | 5'-CTGGACTCTACGACTTCACAATG-3' | 5'-AGTTGGCGATCACTGACAGTT-3'   |
| Cd163        | 5'-TGTGCAGTAACGGCTGGAG-3'     | 5'-ATCATGTTTGCAGTCCCAAAGA-3'  |
| Trem2        | 5'-CTGGAACCGTCACCATCACTC-3'   | 5'-GACCCACAGGATGAAACCTGC-3'   |
| Havcr2       | 5'-ACTGGTGACCCTCCATAATAACA-3' | 5'-GCAGTTCTGATCGTTTCTCCA-3'   |
| Pim2         | 5'-CGGGTGTGATACGCCTTCTTG-3'   | 5'-CGGGTGTGATACGCCTTCTTG-3'   |
| Csf1r        | 5'-TGTCATCGAGCCTAGTGGC-3'     | 5'-CGGGAGATTCAGGGTCCAAG-3'    |
| Cd8          | 5'-CCGTTGACCCGCTTTCTGT-3'     | 5'-TTCGGCGTCCATTTTCTTTGG-3'   |
| Gzmb         | 5'-CCACTCTCGACCCTACATGG-3'    | 5'-GGCCCCAAAGTGACATTTATT-3'   |
| Foxp3        | 5'-CACCTATGCCACCCTTATCCG-3'   | 5'-CATGCGAGTAAACCAATGGTAGA-3' |

**Table. S4 Real-Time PCR Primers for Gene Expression.**

Primers used for real-time PCR. All the sequences were from PrimerBank (<https://pga.mgh.harvard.edu/primerbank/>).
